# Supplementary material for: Phenomenology of Neapolitan Pizza Baking in a Traditional Wood-Fired Oven
Source: MDPI journal article supplement (doi:10.3390/foods12040890), 2023-02-19

## **Phenomenology of Neapolitan pizza baking in a traditional wood-fired oven**

Aniello FALCIANO <sup>1,2</sup>, Mauro MORESI <sup>3\*</sup> and Paolo MASI <sup>1,2</sup>

<sup>1</sup> Department of Agricultural Sciences, University of Naples Federico II, Portici, Italy

<sup>2</sup> Academic Centre for Food Innovation, University of Naples Federico II, Portici, Italy

<sup>3</sup> Department for Innovation in the Biological Agrofood and Forestry Systems, University of Tuscia, Viterbo, Italy

**Table S1** – Effect of baking time ( $t_B$ ) on the average value and standard deviation of the instantaneous height (h) of the rim of different pizza samples (see types A-D in Table 1) during their baking in a pilot-scale wood-fired oven.

| Rim height (h) of pizza sample [cm]<br>$t_B$ [s] | A                      | B                        | C                      | D                      |
|--------------------------------------------------|------------------------|--------------------------|------------------------|------------------------|
| 0                                                | 0.68±0.11 <sup>a</sup> | 0.85±0.14 <sup>b</sup>   | 0.74±0.20 <sup>a</sup> | 0.87±0.17 <sup>b</sup> |
| 2                                                | 0.78±0.14 <sup>a</sup> | 0.94±0.16 <sup>b</sup>   | 0.82±0.18 <sup>a</sup> | 0.96±0.16 <sup>b</sup> |
| 4                                                | 0.84±0.18 <sup>a</sup> | 1.01±0.19 <sup>b</sup>   | 0.88±0.17 <sup>a</sup> | 1.01±0.16 <sup>b</sup> |
| 6                                                | 0.91±0.18 <sup>a</sup> | 1.07±0.20 <sup>b</sup>   | 0.93±0.19 <sup>a</sup> | 1.08±0.20 <sup>b</sup> |
| 8                                                | 0.98±0.21 <sup>a</sup> | 1.12±0.21 <sup>b</sup>   | 0.99±0.20 <sup>a</sup> | 1.19±0.23 <sup>b</sup> |
| 10                                               | 1.04±0.21 <sup>a</sup> | 1.18±0.22 <sup>a,b</sup> | 1.09±0.22 <sup>a</sup> | 1.23±0.24 <sup>b</sup> |
| 12                                               | 1.11±0.22 <sup>a</sup> | 1.37±0.22 <sup>b</sup>   | 1.20±0.25 <sup>a</sup> | 1.34±0.23 <sup>b</sup> |
| 14                                               | 1.21±0.26 <sup>a</sup> | 1.47±0.22 <sup>b</sup>   | 1.31±0.22 <sup>a</sup> | 1.51±0.28 <sup>b</sup> |
| 16                                               | 1.34±0.23 <sup>a</sup> | 1.55±0.25 <sup>b</sup>   | 1.48±0.21 <sup>a</sup> | 1.68±0.35 <sup>b</sup> |
| 18                                               | 1.40±0.28 <sup>a</sup> | 1.72±0.33 <sup>b</sup>   | 1.57±0.22 <sup>a</sup> | 1.87±0.42 <sup>b</sup> |
| 20                                               | 1.47±0.33 <sup>a</sup> | 1.82±0.37 <sup>b</sup>   | 1.62±0.21 <sup>a</sup> | 1.98±0.43 <sup>b</sup> |
| 24                                               | 1.54±0.34 <sup>a</sup> | 1.92±0.41 <sup>b</sup>   | 1.71±0.24 <sup>a</sup> | 2.11±0.47 <sup>b</sup> |
| 28                                               | 1.59±0.37 <sup>a</sup> | 2.10±0.47 <sup>b</sup>   | 1.83±0.28 <sup>a</sup> | 2.17±0.47 <sup>b</sup> |
| 32                                               | 1.63±0.39 <sup>a</sup> | 2.21±0.45 <sup>b</sup>   | 1.88±0.29 <sup>a</sup> | 2.24±0.47 <sup>b</sup> |
| 36                                               | 1.69±0.42 <sup>a</sup> | 2.26±0.42 <sup>b</sup>   | 1.92±0.31 <sup>a</sup> | 2.32±0.49 <sup>b</sup> |
| 40                                               | 1.75±0.45 <sup>a</sup> | 2.32±0.42 <sup>b</sup>   | 1.97±0.33 <sup>a</sup> | 2.40±0.50 <sup>b</sup> |
| 50                                               | 1.81±0.49 <sup>a</sup> | 2.39±0.38 <sup>b</sup>   | 2.04±0.35 <sup>a</sup> | 2.47±0.50 <sup>b</sup> |
| 60                                               | 1.88±0.52 <sup>a</sup> | 2.47±0.36 <sup>b</sup>   | 2.08±0.36 <sup>a</sup> | 2.53±0.50 <sup>b</sup> |
| 70                                               | 1.93±0.50 <sup>a</sup> | 2.58±0.34 <sup>b</sup>   | 2.12±0.35 <sup>a</sup> | 2.58±0.45 <sup>b</sup> |
| 80                                               | 1.96±0.50 <sup>a</sup> | 2.61±0.33 <sup>b</sup>   | 2.14±0.35 <sup>a</sup> | 2.63±0.45 <sup>b</sup> |

In each row, values with the same letter have no significant difference at  $p < 0.05$ .

**Table S2:** Main results (mean  $\pm$  sd) of 12 repeated baking tests performed in a wood-fired pizza oven fed with 3 kg/h of oak logs using five pizza types A- E (see Table 1): effect of baking time ( $t_B$ ) on the instantaneous temperature of the oven floor exposed to fire ( $T_{FL}$ ) or shielded by the pizza sample ( $T_{FLbp}$ ), temperatures of the pizza rim ( $T_{SR}$ ), upper ( $T_{SU}$ ) and lower ( $T_{SL}$ ) areas, overall mass of sample ( $m_s$ ), and estimated moisture fraction on oil-free basis ( $x_w$ ). When 2 or 3 ingredients were added,  $T_{SU}$  was expressed by averaging the temperatures of the areas covered with tomato puree (TP), sunflower oil (SO) and/or mozzarella cheese (MC).

| tb                                                              | T <sub>FL</sub>      | T <sub>FLbp</sub>      | T <sub>SR</sub>        | T <sub>SU</sub>        |                        | T <sub>SL</sub>        | ms                     | xw                     |
|-----------------------------------------------------------------|----------------------|------------------------|------------------------|------------------------|------------------------|------------------------|------------------------|------------------------|
| [s]                                                             | [°C]                 | [°C]                   | [°C]                   | [°C]                   |                        | [°C]                   | [g]                    | [g/g]                  |
| White pizza                                                     |                      |                        |                        |                        |                        |                        |                        |                        |
| 0                                                               | 442 ± 9 <sup>a</sup> | 442 ± 9 <sup>a</sup>   | 21.0±0.1 <sup>a</sup>  | 21.0±0.1 <sup>a</sup>  |                        | 21.0±0.1 <sup>a</sup>  | 250.0±1.0 <sup>a</sup> | 0.450                  |
| 20                                                              | 441 ± 7 <sup>a</sup> | 363 ±10 <sup>b</sup>   | 80.0±3.0 <sup>b</sup>  | 103.0±2.0 <sup>b</sup> |                        | 84.0±2.0 <sup>b</sup>  | 248.2±0.2 <sup>b</sup> | 0.446                  |
| 40                                                              | 436 ±11 <sup>a</sup> | 348 ± 5 <sup>b</sup>   | 116.0±3.0 <sup>c</sup> | 138.0±7.0 <sup>c</sup> |                        | 97.0±2.0 <sup>c</sup>  | 245.9±0.6 <sup>c</sup> | 0.440                  |
| 60                                                              | 435 ± 7 <sup>a</sup> | 332 ± 7 <sup>c</sup>   | 130.0±6.0 <sup>d</sup> | 157.0±6.0 <sup>d</sup> |                        | 102.0±2.0 <sup>d</sup> | 243.0±1.0 <sup>d</sup> | 0.434                  |
| 80                                                              | 432 ±10 <sup>a</sup> | 325 ± 5 <sup>c</sup>   | 148.0±9.0 <sup>e</sup> | 182.0±9.0 <sup>e</sup> |                        | 106.0±3.0 <sup>d</sup> | 240.6±0.7 <sup>e</sup> | 0.428                  |
| White pizza garnished with sunflower oil                        |                      |                        |                        |                        |                        |                        |                        |                        |
| 0                                                               | 446 ± 5 <sup>a</sup> | 448 ± 7 <sup>a</sup>   | 21.0±0.1 <sup>a</sup>  | 21.0±0.1 <sup>a</sup>  |                        | 21.0±0.1 <sup>a</sup>  | 280.0±2.0 <sup>a</sup> | 0.450                  |
| 20                                                              | 443 ± 6 <sup>a</sup> | 351 ±11 <sup>b</sup>   | 86.0±3.0 <sup>b</sup>  | 100.0±3.0 <sup>b</sup> |                        | 81.0±2.0 <sup>b</sup>  | 278.4±0.2 <sup>a</sup> | 0.446                  |
| 40                                                              | 441 ± 7 <sup>a</sup> | 342 ± 9 <sup>b</sup>   | 116.0±7.0 <sup>c</sup> | 128.0±6.0 <sup>c</sup> |                        | 93.0±5.0 <sup>c</sup>  | 276.7±0.6 <sup>b</sup> | 0.442                  |
| 60                                                              | 439 ±11 <sup>a</sup> | 327 ± 7 <sup>c</sup>   | 149.0±7.0 <sup>d</sup> | 148.0±5.0 <sup>d</sup> |                        | 101.0±3.0 <sup>d</sup> | 272.4±1.3 <sup>c</sup> | 0.432                  |
| 80                                                              | 434 ± 8 <sup>a</sup> | 314 ± 7 <sup>b,c</sup> | 169.0±9.0 <sup>e</sup> | 156.0±4.0 <sup>d</sup> |                        | 105.0±2.0 <sup>d</sup> | 267.7±1.6 <sup>d</sup> | 0.421                  |
| Tomato pizza                                                    |                      |                        |                        |                        |                        |                        |                        |                        |
| 0                                                               | 443 ± 8 <sup>a</sup> | 440 ± 7 <sup>a</sup>   | 21.0±0.1 <sup>a</sup>  | 21.0±0.1 <sup>a</sup>  |                        | 21.0±0.1 <sup>a</sup>  | 320.0±2.0 <sup>a</sup> | 0.555                  |
| 20                                                              | 442 ± 7 <sup>a</sup> | 339 ±10 <sup>b</sup>   | 83.0±2.0 <sup>b</sup>  | 59.0±2.0 <sup>b</sup>  |                        | 75.0±2.0 <sup>b</sup>  | 319.1±0.3 <sup>a</sup> | 0.553                  |
| 40                                                              | 439 ± 7 <sup>a</sup> | 328 ± 6 <sup>b</sup>   | 113.0±4.0 <sup>c</sup> | 71.0±2.0 <sup>c</sup>  |                        | 92.0±3.0 <sup>c</sup>  | 317.1±0.5 <sup>b</sup> | 0.551                  |
| 60                                                              | 438 ± 8 <sup>a</sup> | 320 ±10 <sup>b,c</sup> | 124.0±3.0 <sup>d</sup> | 76.0±2.0 <sup>d</sup>  |                        | 96.0±2.0 <sup>c</sup>  | 314.1±0.3 <sup>c</sup> | 0.546                  |
| 80                                                              | 436 ± 6 <sup>a</sup> | 304 ± 5 <sup>c</sup>   | 136.0±3.0 <sup>e</sup> | 81.0±2.0 <sup>e</sup>  |                        | 101.0±2.0 <sup>d</sup> | 311.2±0.8 <sup>d</sup> | 0.542                  |
| Tomato pizza garnished with sunflower oil                       |                      |                        |                        |                        |                        |                        |                        |                        |
|                                                                 |                      |                        |                        | TP area                | SO area                |                        |                        |                        |
| 0                                                               | 440 ± 7 <sup>a</sup> | 438 ±10 <sup>a</sup>   | 21.0±0.1 <sup>a</sup>  | 21.0±0.1 <sup>a</sup>  | 21.0±0.1 <sup>a</sup>  | 21.0±0.1 <sup>a</sup>  | 350.0±3.0 <sup>a</sup> | 0.555                  |
| 20                                                              | 438 ± 5 <sup>a</sup> | 332 ±12 <sup>b</sup>   | 88.0±3.0 <sup>b</sup>  | 61.0±3.0 <sup>b</sup>  | 89.0±5.0 <sup>b</sup>  | 74.0±3.0 <sup>b</sup>  | 349.4±0.1 <sup>a</sup> | 0.554                  |
| 40                                                              | 437 ± 7 <sup>a</sup> | 318 ± 5 <sup>b,c</sup> | 115.0±5.0 <sup>c</sup> | 73.0±2.0 <sup>c</sup>  | 100.0±4.0 <sup>c</sup> | 87.0±2.0 <sup>c</sup>  | 347.2±0.5 <sup>b</sup> | 0.551                  |
| 60                                                              | 437 ± 6 <sup>a</sup> | 313 ± 7 <sup>b,c</sup> | 128.0±5.0 <sup>d</sup> | 79.0±2.0 <sup>d</sup>  | 103.0±2.0 <sup>c</sup> | 93.0±2.0 <sup>d</sup>  | 344.7±0.3 <sup>c</sup> | 0.547                  |
| 80                                                              | 436 ± 6 <sup>a</sup> | 309 ± 7 <sup>c</sup>   | 141.0±2.0 <sup>e</sup> | 84.0±2.0 <sup>e</sup>  | 106.0±2.0 <sup>c</sup> | 102.0±2.0 <sup>e</sup> | 341.0±1.9 <sup>d</sup> | 0.542                  |
| Tomato pizza garnished with sunflower oil and mozzarella cheese |                      |                        |                        |                        |                        |                        |                        |                        |
|                                                                 |                      |                        |                        | TP area                | SO area                | MC area                |                        |                        |
| 0                                                               | 442 ± 9 <sup>a</sup> | 437 ±12 <sup>a</sup>   | 21 ± 0.1 <sup>a</sup>  | 21.0±0.1 <sup>a</sup>  | 21.0±0.1 <sup>a</sup>  | 15.0±0.1 <sup>a</sup>  | 21.0±0.1 <sup>a</sup>  | 430.0±4.0 <sup>a</sup> |
| 40                                                              | 439 ± 4 <sup>a</sup> | 336 ±10 <sup>b</sup>   | 98 ± 3 <sup>b</sup>    | 63.0±2.0 <sup>b</sup>  | 92.0±4.0 <sup>b</sup>  | 51.6±1.8 <sup>b</sup>  | 74.3±2.6 <sup>b</sup>  | 428.0±0.6 <sup>a</sup> |

|     |                      |                        |                      |                       |                        |                       |                        |                        |       |
|-----|----------------------|------------------------|----------------------|-----------------------|------------------------|-----------------------|------------------------|------------------------|-------|
| 60  | 438 ± 7 <sup>a</sup> | 325 ± 6 <sup>b,c</sup> | 113 ± 3 <sup>c</sup> | 73.0±2.0 <sup>c</sup> | 98.0±3.0 <sup>c</sup>  | 55.0±2.0 <sup>c</sup> | 86.7±2.0 <sup>c</sup>  | 427.0±0.6 <sup>b</sup> | 0.540 |
| 80  | 436 ± 6 <sup>a</sup> | 314 ± 7 <sup>b,c</sup> | 130 ± 5 <sup>d</sup> | 77.0±3.0 <sup>c</sup> | 101.0±2.0 <sup>c</sup> | 59.9±1.6 <sup>d</sup> | 92.8±2.1 <sup>d</sup>  | 425.1±0.6 <sup>c</sup> | 0.538 |
| 100 | 436 ± 5 <sup>a</sup> | 307 ± 6 <sup>c</sup>   | 155 ± 5 <sup>e</sup> | 87.0±2.0 <sup>c</sup> | 110.6±3.4 <sup>d</sup> | 67.2±2.4 <sup>e</sup> | 106.1±3.7 <sup>e</sup> | 423.0±0.3 <sup>d</sup> | 0.536 |

Mean values within the same parameter at different baking times followed by different superscript letters significantly differ by the Tukey test (p<0.05).

**Table S3** Mean value and standard deviation of the empirical coefficients **a** and **b** of Eq. (1) and corresponding coefficient of determinations ( $r^2$ ) for the water heating and pizza baking tests carried out in this work.

| <b>Sample</b>                       | <b>a</b>   | <b>b</b>    | <b><math>r^2</math></b> |
|-------------------------------------|------------|-------------|-------------------------|
| Water                               | -2.99±0.26 | 0.084±0.004 | 0.987                   |
| A) Pizza as such                    | -1.65±0.34 | 0.022±0.002 | 0.979                   |
| B) Pizza topped with SO             | -3.13±0.52 | 0.035±0.004 | 0.977                   |
| C) Pizza topped with TP             | -6.22±0.48 | 0.104±0.007 | 0.992                   |
| D) Pizza topped with TS and SO      | -5.96±0.31 | 0.097±0.004 | 0.996                   |
| E) Pizza topped with TS, SO, and MC | -2.16±0.27 | 0.047±0.004 | 0.980                   |

**Table S4**

Effect of baking time ( $t_B$ ) on the percentage degree of browned ( $Y_{Br}$ ) and blackened ( $Y_{Bl}$ ) areas of the upper and lower area of different pizza samples A-E (cf. Table 1) during baking in a wood-fired oven. Each percentage is expressed as mean  $\pm$  sd ( $n = 3$ ).

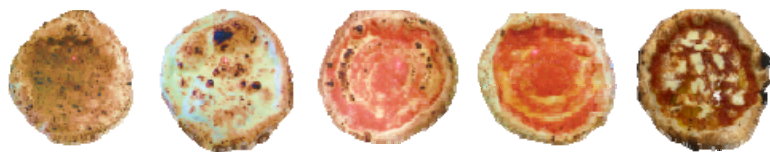

| Pizza sample       | A                                           | B                      | C                    | D                    | E                    | A                                                 | B                     | C                       | D                     | E                     |
|--------------------|---------------------------------------------|------------------------|----------------------|----------------------|----------------------|---------------------------------------------------|-----------------------|-------------------------|-----------------------|-----------------------|
| t <sub>B</sub> (s) | Browned area percentage Y <sub>Br</sub> [%] |                        |                      |                      |                      | Blackened area percentage Y <sub>Bl</sub> [%] (%) |                       |                         |                       |                       |
| Upper pizza side   |                                             |                        |                      |                      |                      |                                                   |                       |                         |                       |                       |
| 20                 | 0.01±0.0                                    | 0.00±0.0               | 2.5±1.0              |                      |                      | 0.00±0.0                                          | 0.00±0.0              | 0.13±0.2                |                       |                       |
| 40                 | 0.3±0.2                                     | 0.07±0.1               | 3.1±1.2              | 1.9±0.3              | 0.08±0.1             | 0.03±0.1                                          | 0.00±0.0              | 0.5±0.3                 | 0.00±0.0              | 0.00±0.0              |
| 60                 | 4.7±1.0                                     | 2.1±1.5                | 8.2±2.0              | 4.3±0.5              | 0.3±0.1              | 0.38±0.1                                          | 0.8±1.7               | 1.7±0.8                 | 0.09±0.1              | 0.17±0.0              |
| 80                 | 26±5 <sup>a</sup>                           | 8.6±1.6 <sup>c,b</sup> | 11±2 <sup>b</sup>    | 10.7±5 <sup>b</sup>  | 2.3±0.1              | 7.9±6 <sup>a</sup>                                | 1.4±1.1 <sup>a</sup>  | 2.9±0.1 <sup>a</sup>    | 3.2±2.0 <sup>a</sup>  | 0.6±0.1               |
| 100                |                                             |                        |                      |                      | 7.3±0.3 <sup>c</sup> |                                                   |                       |                         |                       | 3.95±0.3 <sup>a</sup> |
| Lower pizza side   |                                             |                        |                      |                      |                      |                                                   |                       |                         |                       |                       |
| 20                 | 0.00±0.0                                    | 0.09±0.1               | 0.32±0.3             |                      |                      | 0.00±0.0                                          | 0.00±0.0              | 0.04±0.0                |                       |                       |
| 40                 | 0.03±0.0                                    | 0.2±0.3                | 1.0±0.4              | 1.3±0.9              | 0.13±0.0             | 0.00±0.0                                          | 0.00±0.0              | 0.13±0.1                | 0.05±0.0              | 0.04±0.0              |
| 60                 | 0.06±0.1                                    | 0.11±0.5               | 4.7±1.7              | 1.4±1.4              | 0.40±0.0             | 0.00±0.0                                          | 0.00±0.0              | 0.56±0.1                | 0.07±0.0              | 0.14±0.0              |
| 80                 | 1.4±1.2 <sup>b</sup>                        | 0.3±0.2 <sup>a</sup>   | 7.6±1.2 <sup>c</sup> | 5.9±1.0 <sup>c</sup> | 1.7±0.1              | 0.01±0.0 <sup>c</sup>                             | 0.00±0.0 <sup>c</sup> | 0.87±0.4 <sup>a,b</sup> | 0.37±0.2 <sup>b</sup> | 0.80±0.1              |
| 100                |                                             |                        |                      |                      | 2.8±0.1 <sup>b</sup> |                                                   |                       |                         |                       | 0.94±0.1 <sup>a</sup> |

Mean values within the same parameter at different baking times followed by different superscript letters significantly differ by the Tukey test ( $p < 0.05$ ).

**Figure S1**

Front picture of the wood-fired pizza oven used in this work.

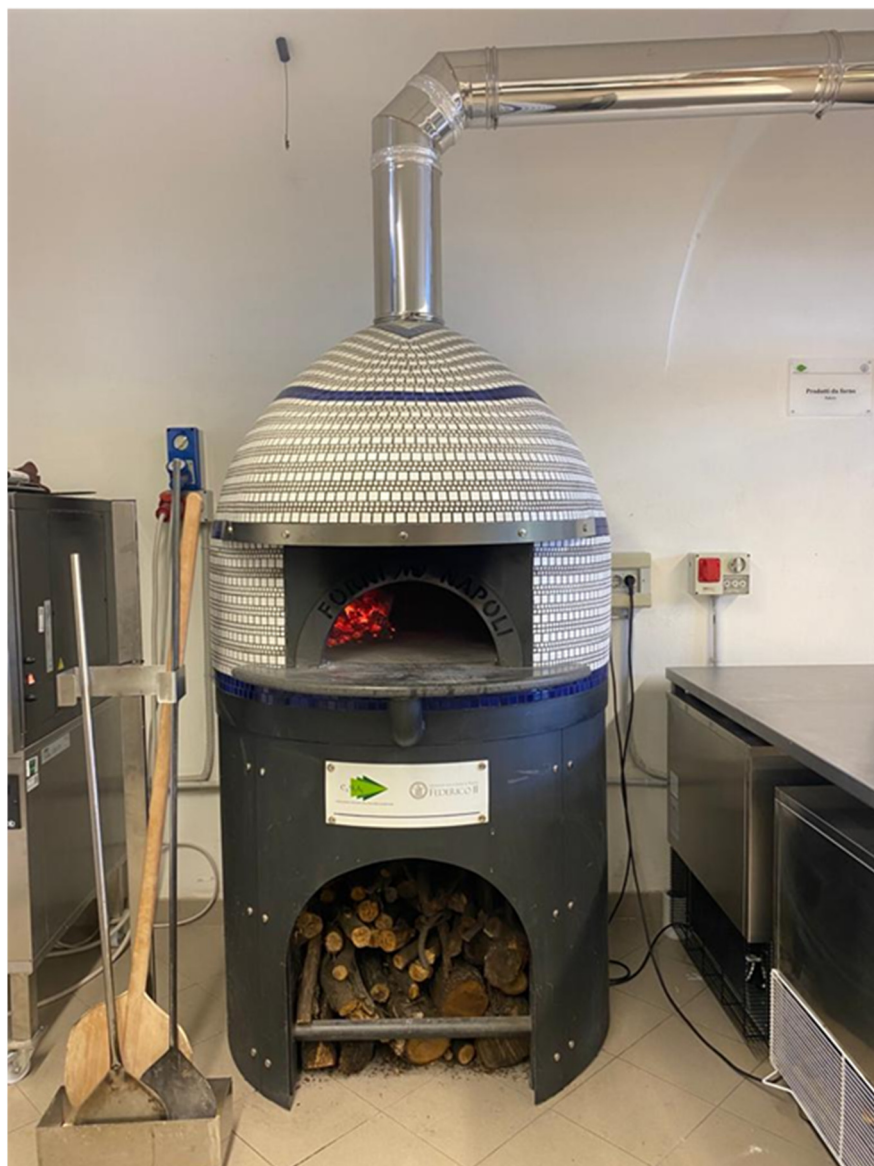

**Figure S2**

Color spectra of the upper and lower sides of pizza samples A-E (cf. Table 1) as baked in the pilot-scale wood-fired oven for 80 s showing the proportion (percentage of surface) of each unique color measured in a 4096-color space if greater than 0.1%.

**a) Upper side of pizza sample A**

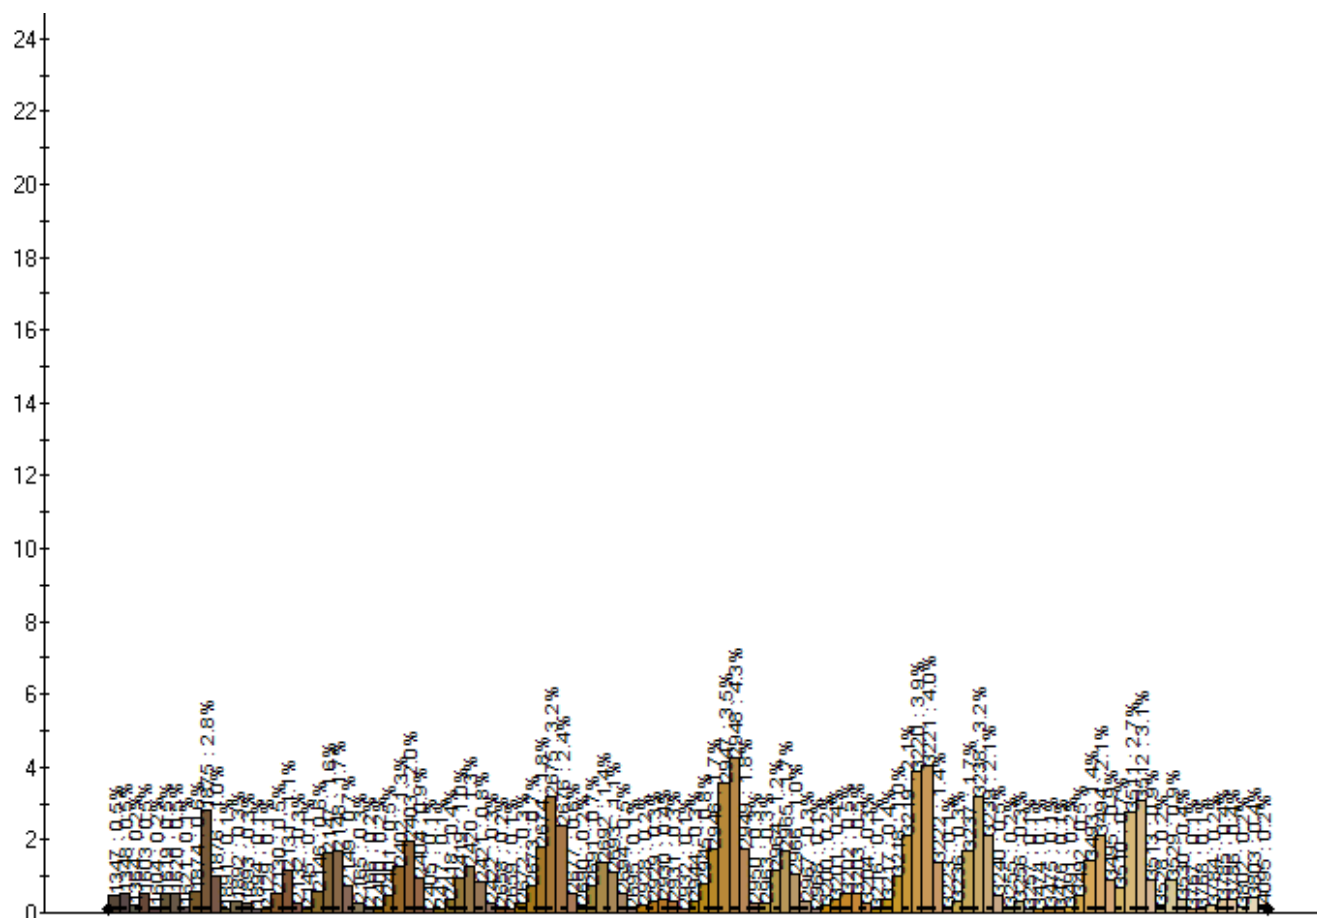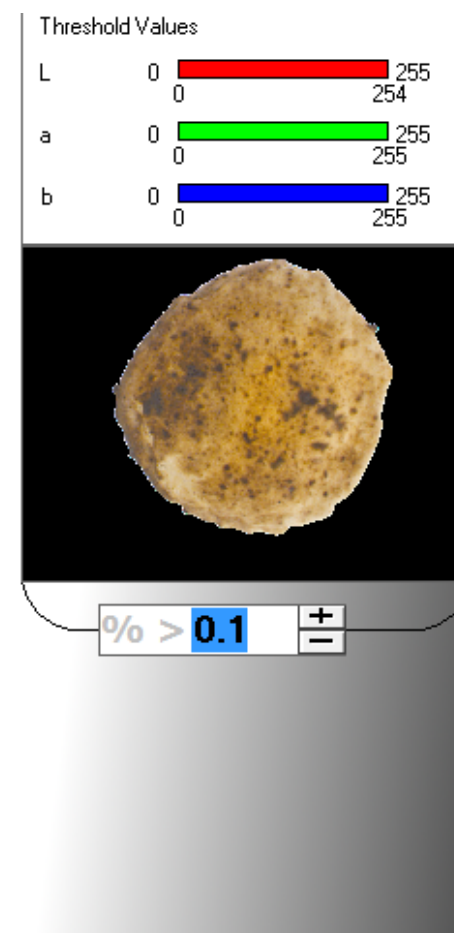



b) Lower side of pizza sample A

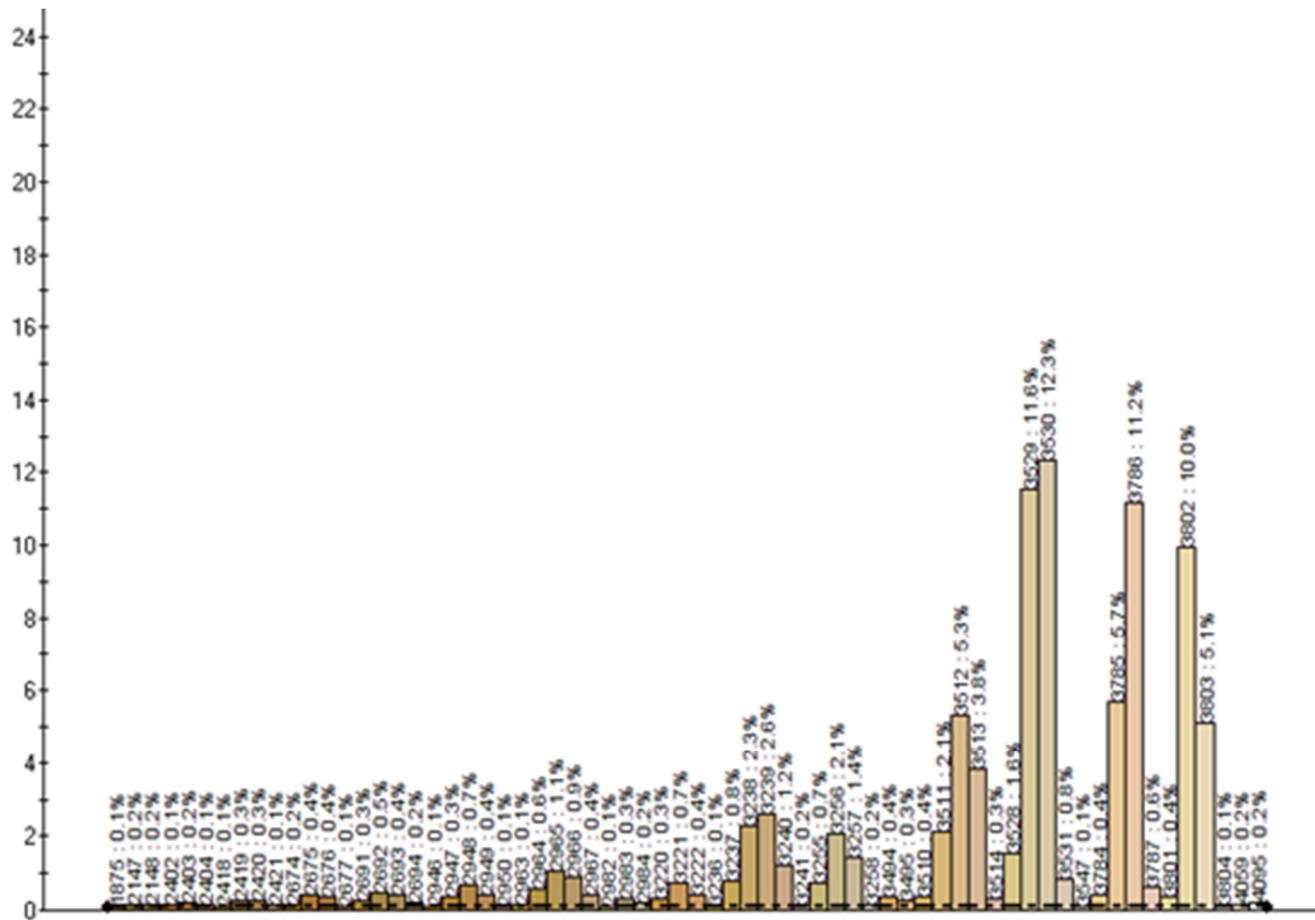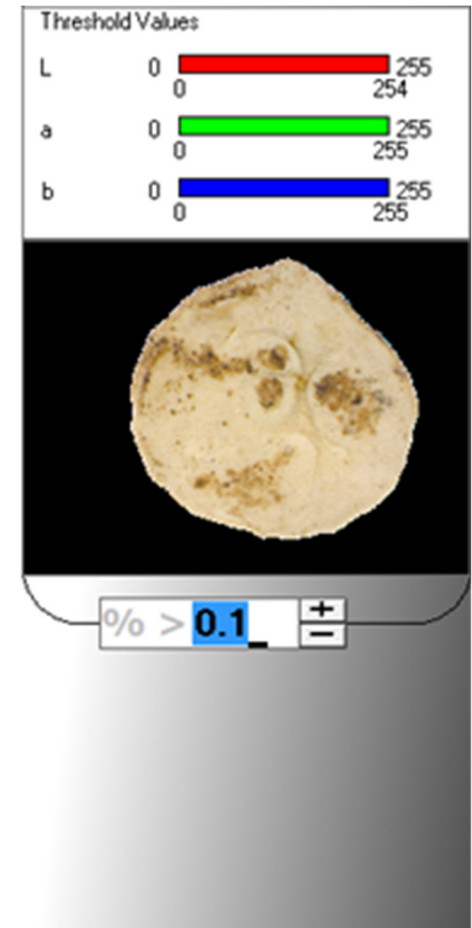

c) Upper side of pizza sample B

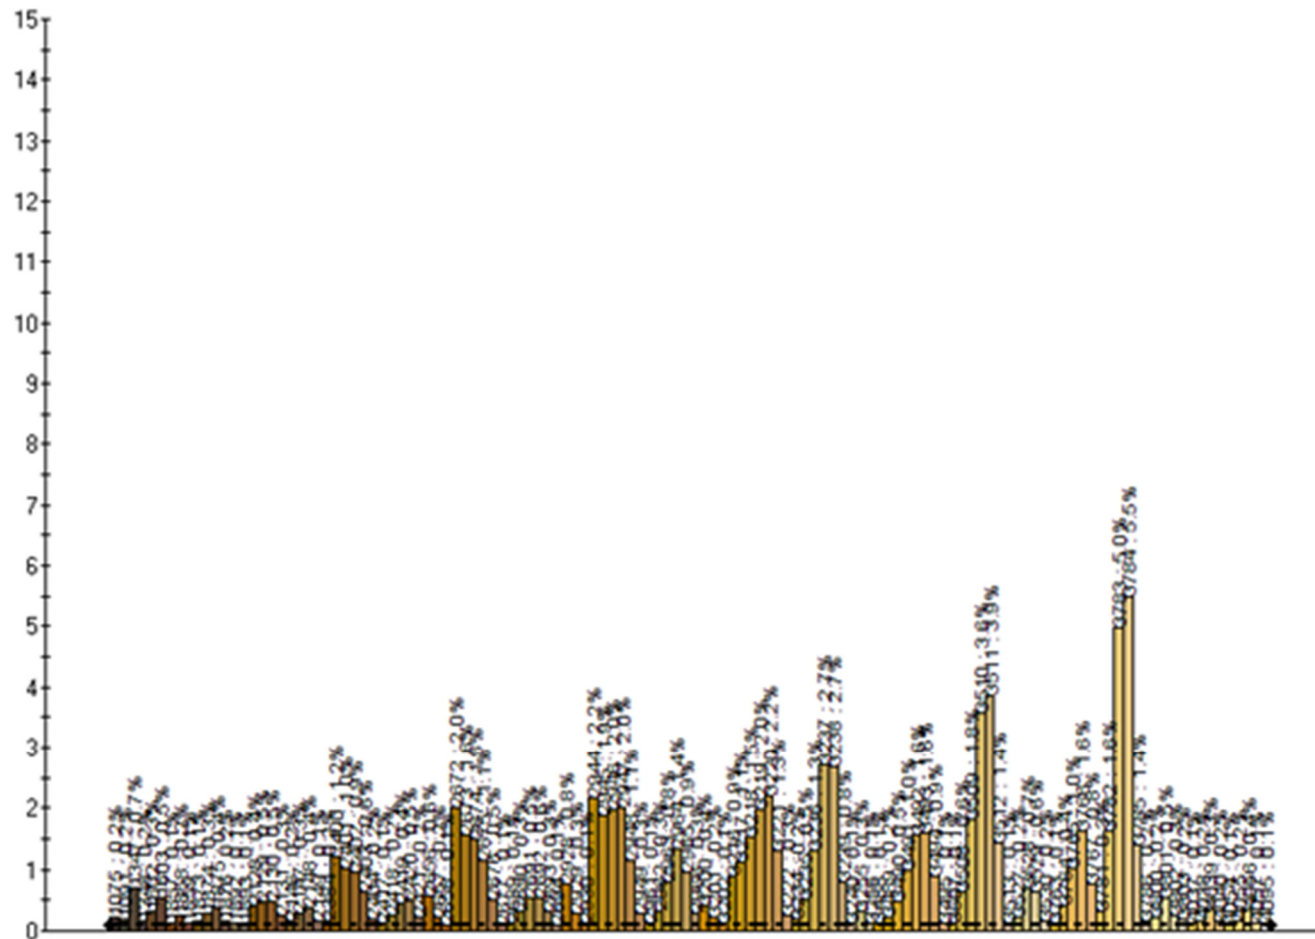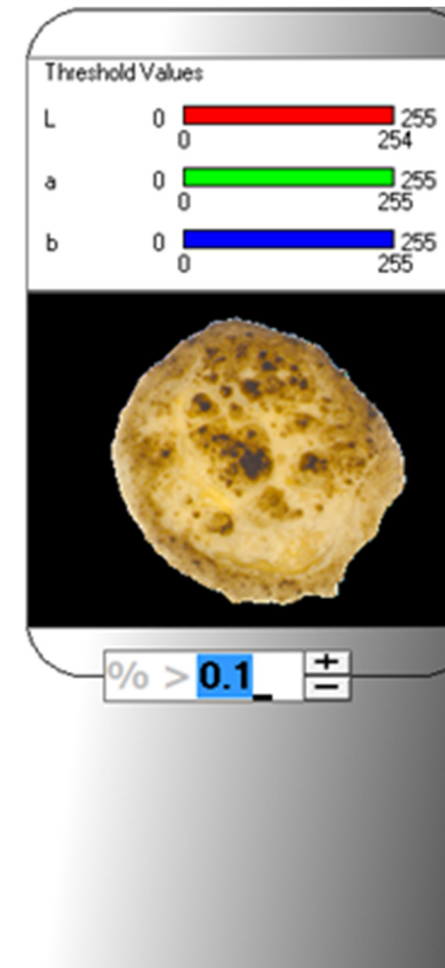

d) Lower side of pizza sample B

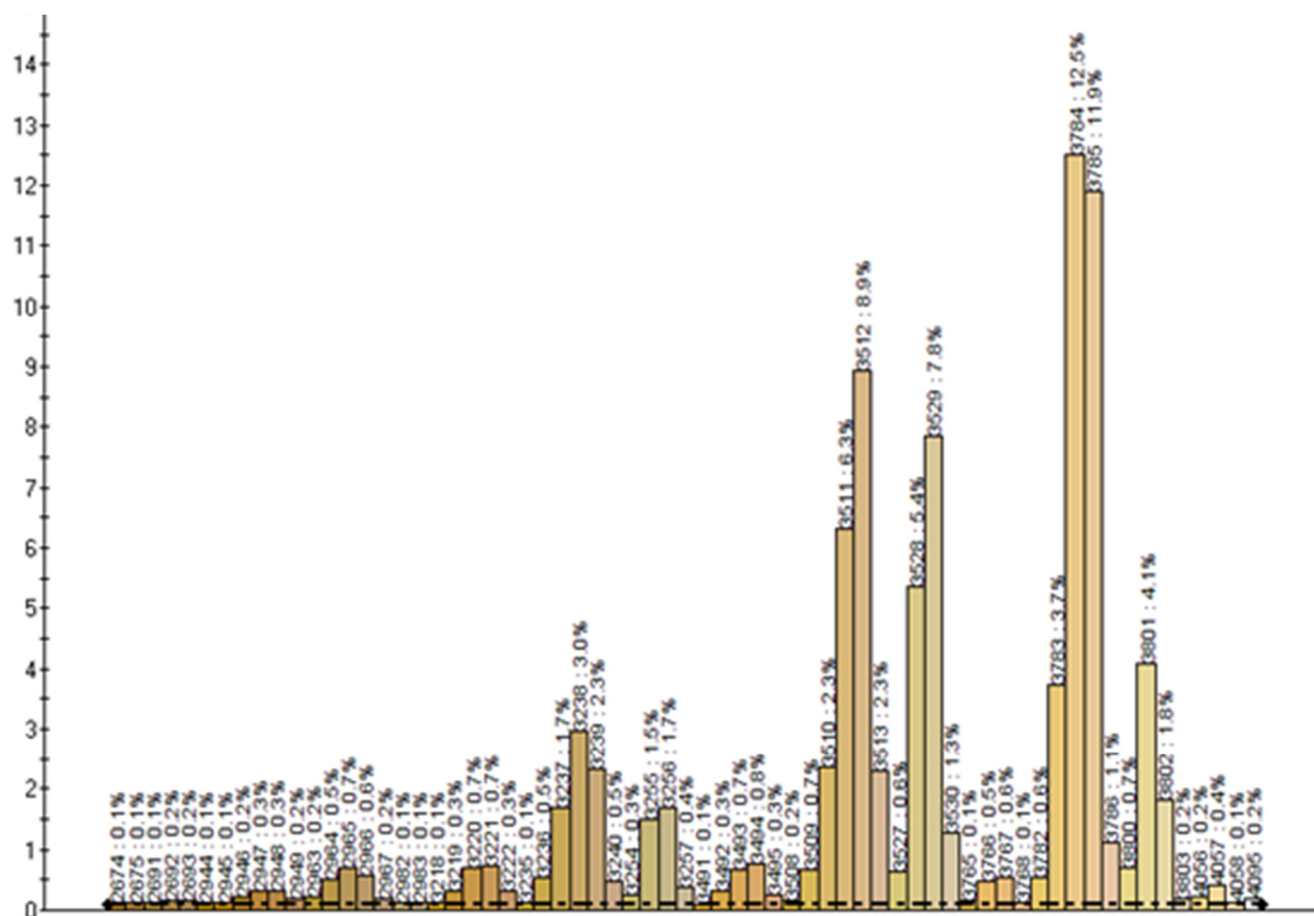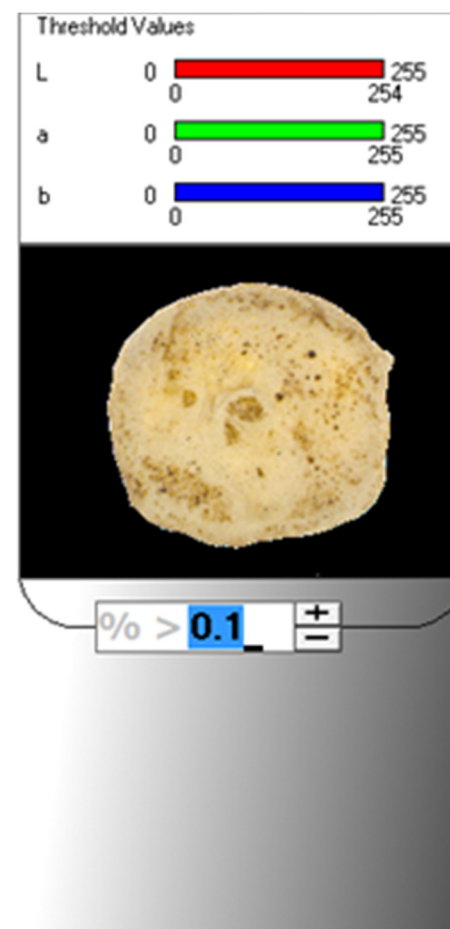

e) Upper side of pizza sample C

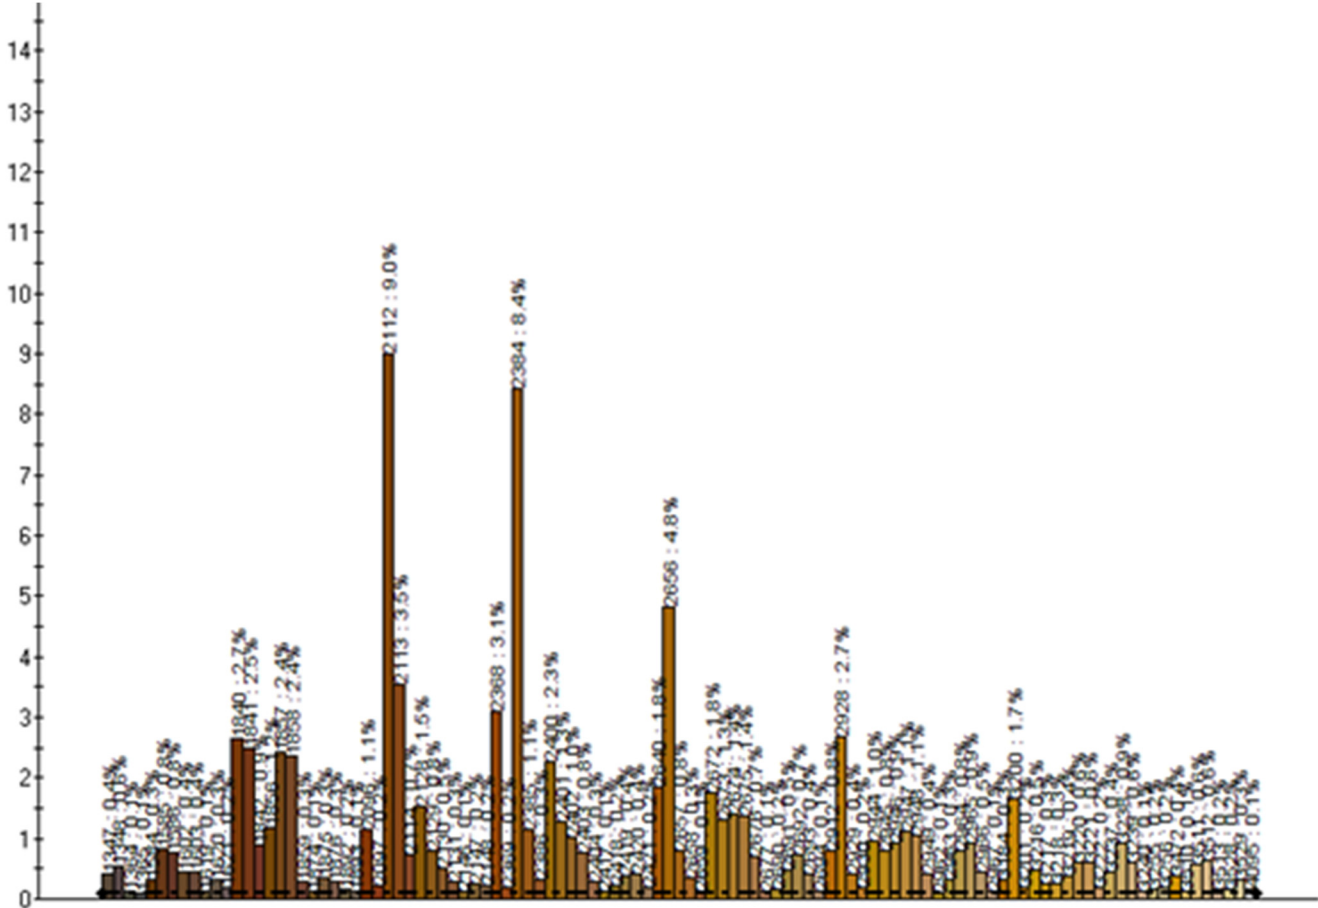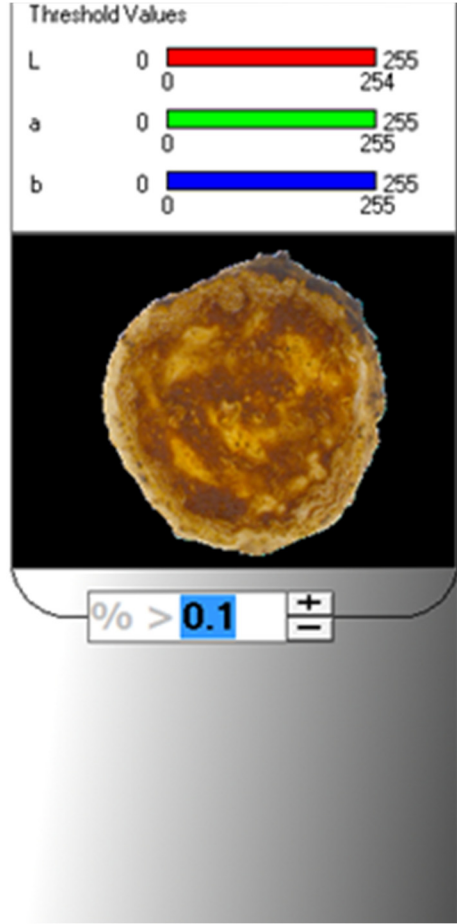

f) Lower side of pizza sample C

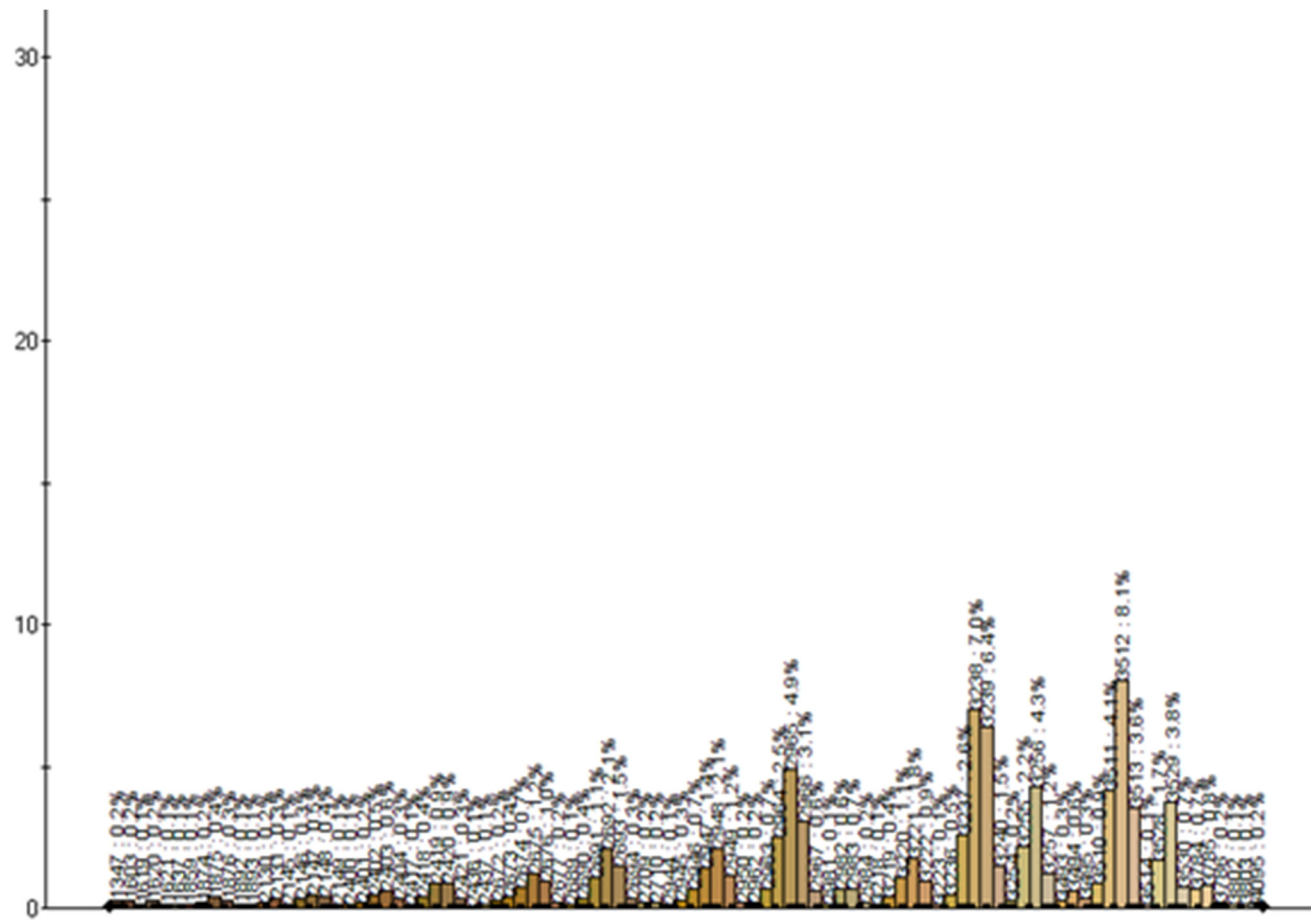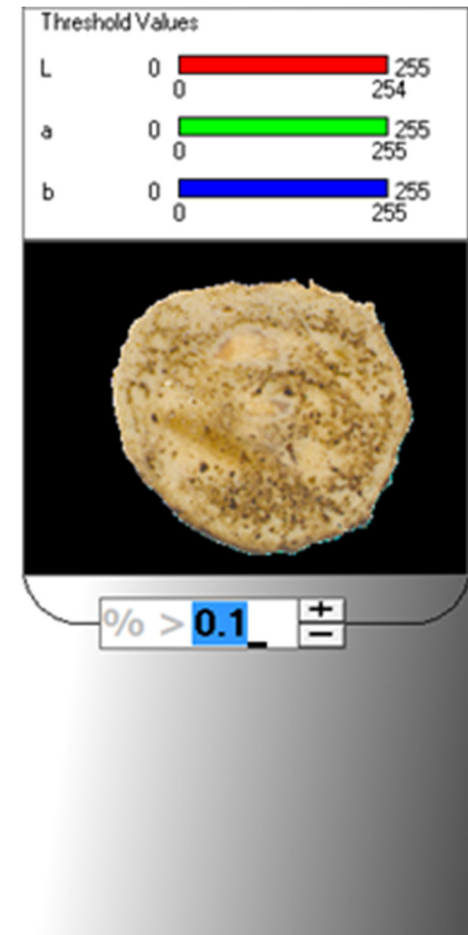

g) Upper side of pizza sample D

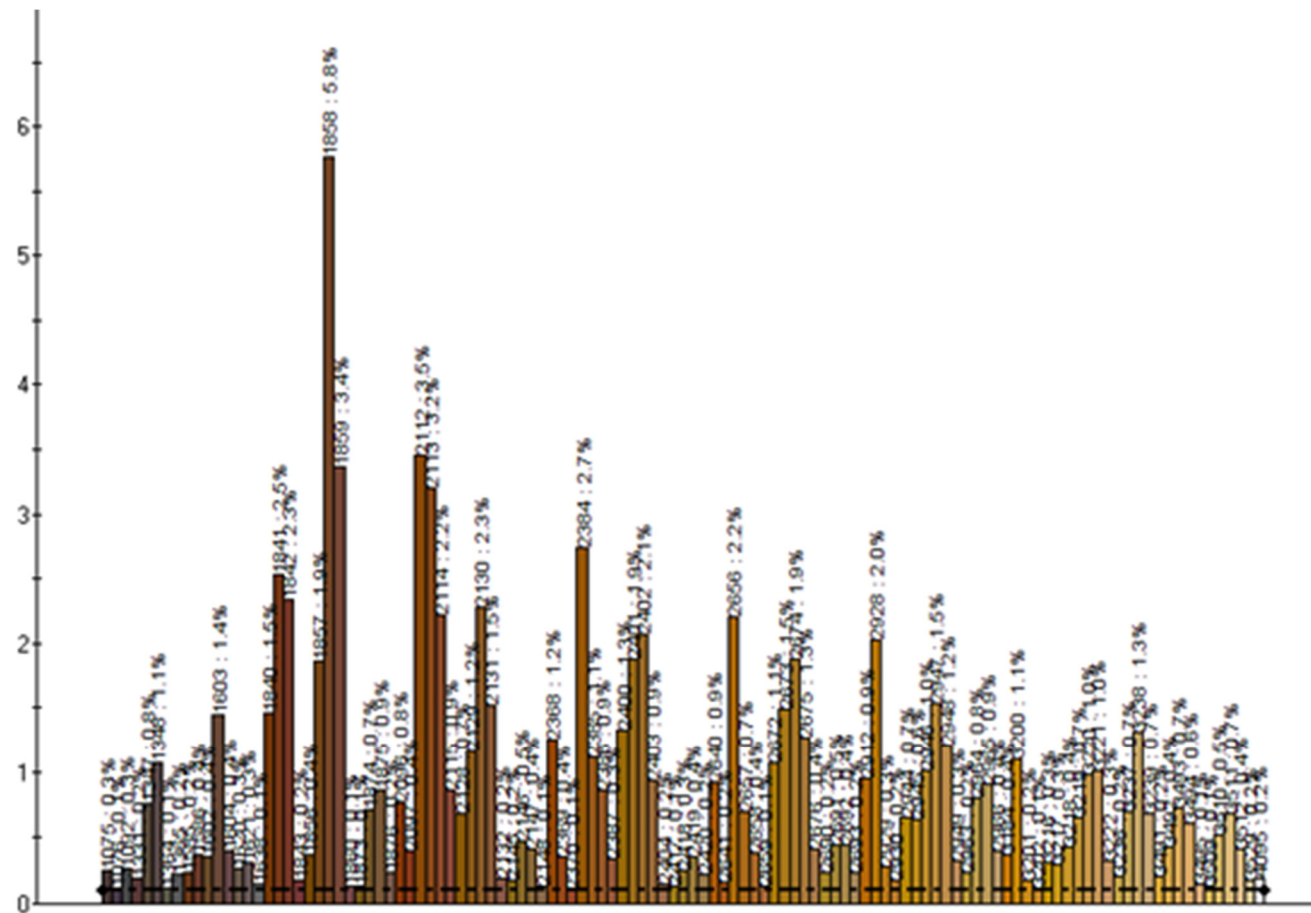



# h) Lower side of pizza sample D

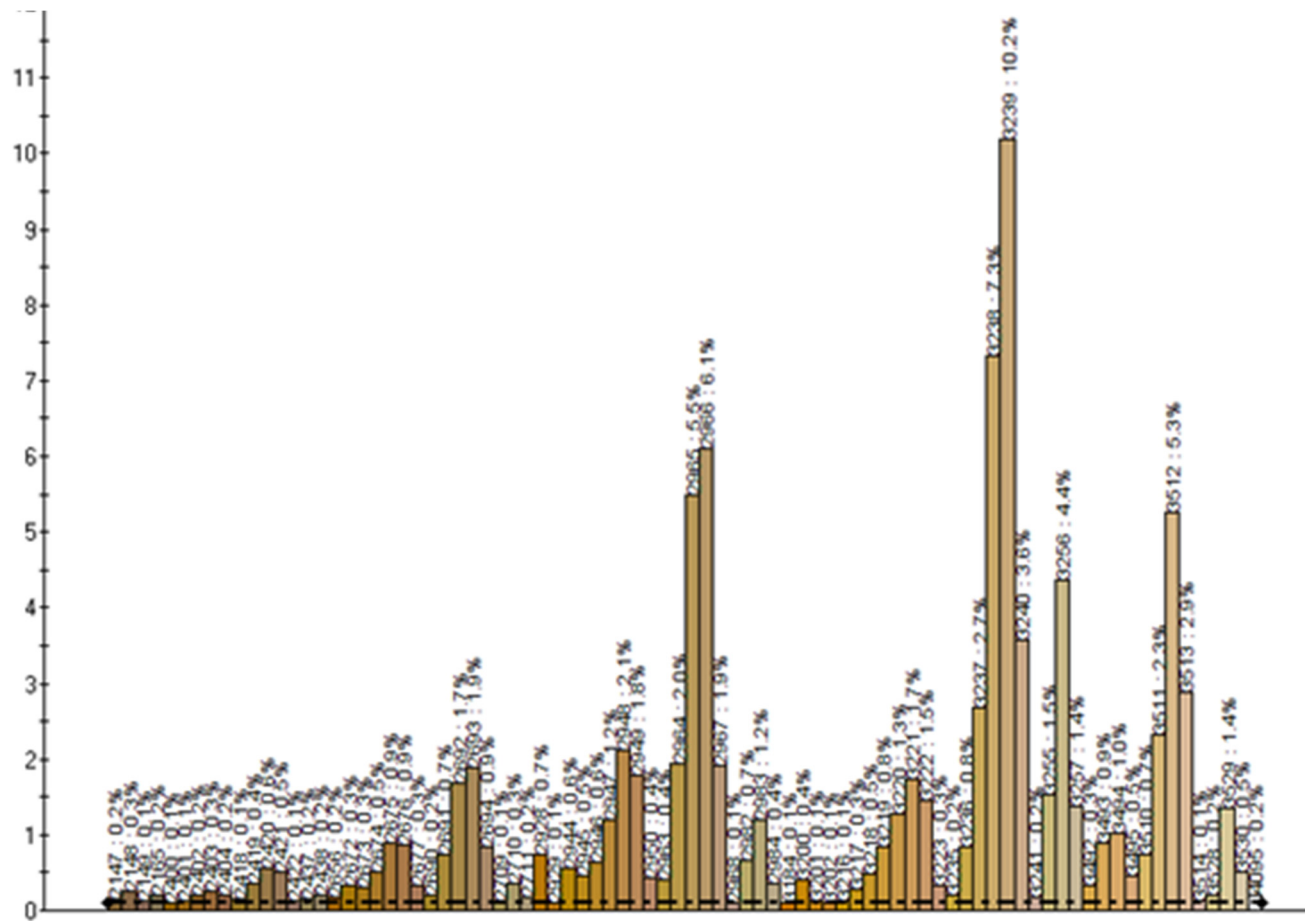

**i) Upper side of pizza sample E**

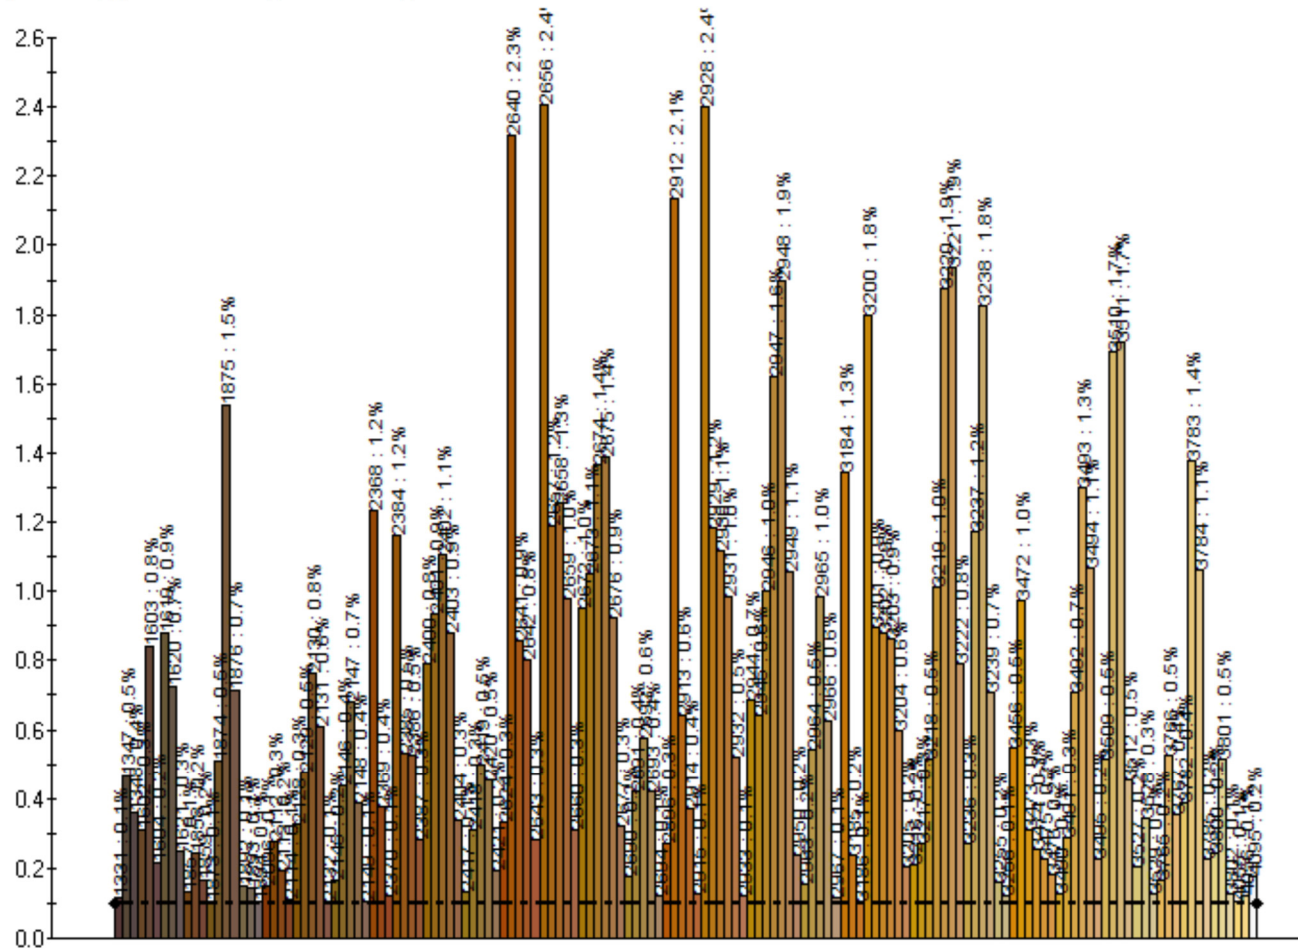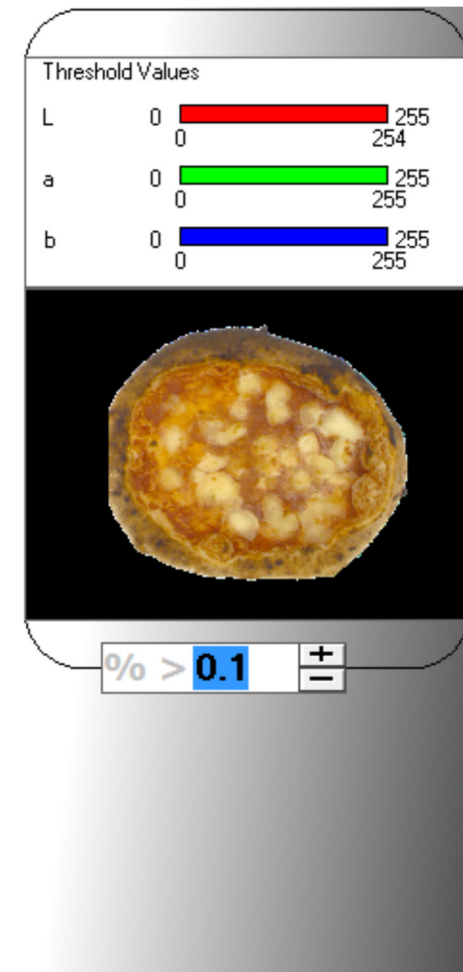



j) Lower side of pizza sample E

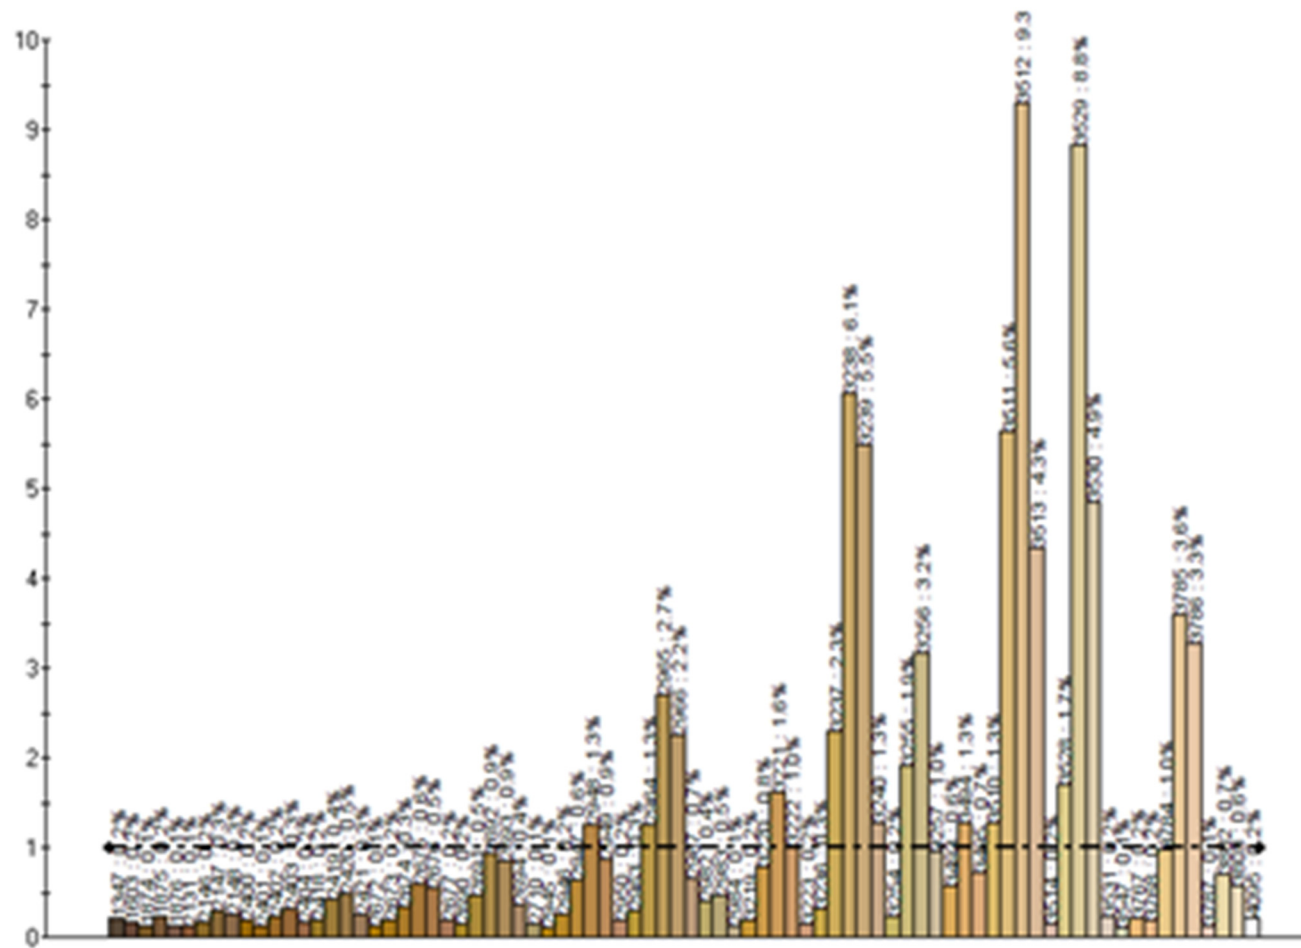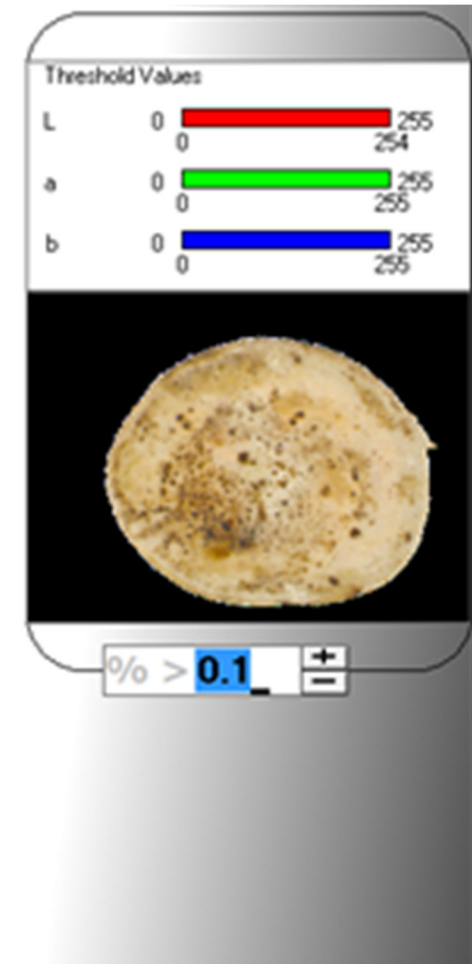

Supplement: s1 [file s1]
